# Supplementary material
Source: PubMed Central journal article supplement (PMC3910492)
Supplement: NIHMS534558-supplement-1_si_001.pdf [file NIHMS534558-supplement-1_si_001.pdf]

## Supplemental Figures

### Fusing Dual-Event Datasets for Mycobacterium Tuberculosis Machine Learning Models and their Evaluation

Sean Ekins<sup>†,‡\*</sup>, Joel S. Freundlich<sup>§,||</sup> and Robert C. Reynolds<sup>⊥</sup>

<sup>†</sup> Collaborative Drug Discovery, 1633 Bayshore Highway, Suite 342, Burlingame, CA 94010, USA.

<sup>‡</sup> Collaborations in Chemistry, 5616 Hilltop Needmore Road, Fuquay-Varina, NC 27526, USA.

<sup>§</sup> Department of Medicine, Center for Emerging and Reemerging Pathogens, Rutgers University – New Jersey Medical School, 185 South Orange Avenue, Newark, NJ 07103, USA.

<sup>||</sup> Department of Pharmacology & Physiology, Rutgers University – New Jersey Medical School, 185 South Orange Avenue, Newark, NJ 07103, USA.

<sup>⊥</sup> University of Alabama at Birmingham, College of Arts and Sciences, Department of Chemistry, 1530 3<sup>rd</sup> Avenue South, Birmingham, AL 35294-1240, USA.

\*To whom correspondence should be addressed. E-mail: [ekinssean@yahoo.com](mailto:ekinssean@yahoo.com)

Running title: Fusing datasets for *Mtb*

Supplemental Figure 1. ARRA dose response and cytotoxicity Bayesian model: good features from FCFP\_6.

|                                                                                                                                                           |                                                                                                                                                            |                                                                                                                                                            |                                                                                                                                                             |                                                                                                                                                               |
|-----------------------------------------------------------------------------------------------------------------------------------------------------------|------------------------------------------------------------------------------------------------------------------------------------------------------------|------------------------------------------------------------------------------------------------------------------------------------------------------------|-------------------------------------------------------------------------------------------------------------------------------------------------------------|---------------------------------------------------------------------------------------------------------------------------------------------------------------|
| 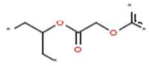 <p>G1: 1673799978<br/>12 out of 21 good<br/>Bayesian Score: 1.945</p>   |  <p>G2: -1449793464<br/>12 out of 23 good<br/>Bayesian Score: 1.902</p>   |  <p>G3: -60038150<br/>47 out of 151 good<br/>Bayesian Score: 1.900</p>    |  <p>G4: 1209850658<br/>27 out of 79 good<br/>Bayesian Score: 1.890</p>    |  <p>G5: -278994470<br/>26 out of 85 good<br/>Bayesian Score: 1.797</p>     |
|  <p>G6: 363977085<br/>48 out of 175 good<br/>Bayesian Score: 1.793</p>   |  <p>G7: -312381965<br/>35 out of 128 good<br/>Bayesian Score: 1.753</p>   |  <p>G8: -1883081175<br/>8 out of 14 good<br/>Bayesian Score: 1.744</p>    |  <p>G9: -1387481105<br/>14 out of 45 good<br/>Bayesian Score: 1.664</p>  |  <p>G10: 1670875748<br/>16 out of 56 good<br/>Bayesian Score: 1.642</p>    |
|  <p>G11: 854938188<br/>10 out of 29 good<br/>Bayesian Score: 1.616</p>   |  <p>G12: -428284881<br/>12 out of 39 good<br/>Bayesian Score: 1.611</p>   |  <p>G13: 1669687439<br/>13 out of 44 good<br/>Bayesian Score: 1.609</p>   |  <p>G14: -1048017265<br/>14 out of 49 good<br/>Bayesian Score: 1.608</p> |  <p>G15: 1941608633<br/>14 out of 49 good<br/>Bayesian Score: 1.608</p>    |
|  <p>G16: 1476473713<br/>14 out of 49 good<br/>Bayesian Score: 1.608</p> |  <p>G17: -1700730929<br/>14 out of 49 good<br/>Bayesian Score: 1.608</p> |  <p>G18: -180488964<br/>12 out of 40 good<br/>Bayesian Score: 1.596</p> |  <p>G19: -891643182<br/>13 out of 45 good<br/>Bayesian Score: 1.595</p> |  <p>G20: 1953499806<br/>30 out of 137 good<br/>Bayesian Score: 1.546</p> |

Supplemental Figure 2. ARRA dose response and cytotoxicity Bayesian model: bad features from FCFP\_6.

|                                                                                                                                                            |                                                                                                                                                             |                                                                                                                                                            |                                                                                                                                                              |                                                                                                                                                                |
|------------------------------------------------------------------------------------------------------------------------------------------------------------|-------------------------------------------------------------------------------------------------------------------------------------------------------------|------------------------------------------------------------------------------------------------------------------------------------------------------------|--------------------------------------------------------------------------------------------------------------------------------------------------------------|----------------------------------------------------------------------------------------------------------------------------------------------------------------|
| 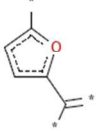 <p>B1: -1280036918<br/>0 out of 154 good<br/>Bayesian Score: -1.988</p>  |  <p>B2: 368675221<br/>0 out of 147 good<br/>Bayesian Score: -1.948</p>     |  <p>B3: -743321149<br/>0 out of 128 good<br/>Bayesian Score: -1.830</p>   |  <p>B4: -1076532720<br/>0 out of 126 good<br/>Bayesian Score: -1.817</p>   |  <p>B5: 1704324327<br/>1 out of 258 good<br/>Bayesian Score: -1.754</p>     |
|  <p>B6: 1160440068<br/>1 out of 258 good<br/>Bayesian Score: -1.754</p>   |  <p>B7: -1775135141<br/>1 out of 258 good<br/>Bayesian Score: -1.754</p>   |  <p>B8: 193617513<br/>0 out of 114 good<br/>Bayesian Score: -1.734</p>    |  <p>B9: -581879738<br/>1 out of 252 good<br/>Bayesian Score: -1.732</p>    |  <p>B10: -1388275145<br/>1 out of 242 good<br/>Bayesian Score: -1.696</p>   |
|  <p>B11: 1790572653<br/>0 out of 107 good<br/>Bayesian Score: -1.682</p>  |  <p>B12: 2015833643<br/>0 out of 106 good<br/>Bayesian Score: -1.674</p>   |  <p>B13: 1919278075<br/>0 out of 106 good<br/>Bayesian Score: -1.674</p>  |  <p>B14: -1915183124<br/>0 out of 105 good<br/>Bayesian Score: -1.667</p>  |  <p>B15: 436975416<br/>0 out of 101 good<br/>Bayesian Score: -1.635</p>     |
|  <p>B16: 2109546364<br/>0 out of 98 good<br/>Bayesian Score: -1.611</p> |  <p>B17: -1956934524<br/>0 out of 96 good<br/>Bayesian Score: -1.595</p> |  <p>B18: 1593831848<br/>0 out of 96 good<br/>Bayesian Score: -1.595</p> |  <p>B19: 2006426266<br/>1 out of 213 good<br/>Bayesian Score: -1.580</p> |  <p>B20: -1266529233<br/>1 out of 213 good<br/>Bayesian Score: -1.580</p> |

Supplemental Figure 3. Combined dose response and cytotoxicity Bayesian model: good features from FCFP\_6.

|                                                                                                                                                          |                                                                                                                                                          |                                                                                                                                                            |                                                                                                                                                             |                                                                                                                                                             |
|----------------------------------------------------------------------------------------------------------------------------------------------------------|----------------------------------------------------------------------------------------------------------------------------------------------------------|------------------------------------------------------------------------------------------------------------------------------------------------------------|-------------------------------------------------------------------------------------------------------------------------------------------------------------|-------------------------------------------------------------------------------------------------------------------------------------------------------------|
| 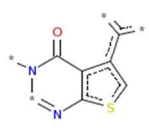 <p>G1: 713865785<br/>10 out of 11 good<br/>Bayesian Score: 1.084</p>   |  <p>G2: -862029858<br/>10 out of 11 good<br/>Bayesian Score: 1.084</p>  |  <p>G3: -1974830073<br/>10 out of 11 good<br/>Bayesian Score: 1.084</p>   |  <p>G4: 92779600<br/>10 out of 11 good<br/>Bayesian Score: 1.084</p>      |  <p>G5: 921426640<br/>7 out of 7 good<br/>Bayesian Score: 1.075</p>      |
|  <p>G6: 529664119<br/>7 out of 7 good<br/>Bayesian Score: 1.075</p>     |  <p>G7: -634910424<br/>7 out of 7 good<br/>Bayesian Score: 1.075</p>    |  <p>G8: 628932230<br/>7 out of 7 good<br/>Bayesian Score: 1.075</p>       |  <p>G9: -92657515<br/>7 out of 7 good<br/>Bayesian Score: 1.075</p>       |  <p>G10: 504464533<br/>16 out of 20 good<br/>Bayesian Score: 1.051</p>   |
|  <p>G11: -583648804<br/>16 out of 20 good<br/>Bayesian Score: 1.051</p> |  <p>G12: 1023493548<br/>13 out of 16 good<br/>Bayesian Score: 1.039</p> |  <p>G13: 1925706152<br/>15 out of 19 good<br/>Bayesian Score: 1.033</p>   |  <p>G14: 883653880<br/>8 out of 9 good<br/>Bayesian Score: 1.026</p>      |  <p>G15: -1355870860<br/>8 out of 9 good<br/>Bayesian Score: 1.026</p>   |
|  <p>G16: -861283934<br/>8 out of 9 good<br/>Bayesian Score: 1.026</p> |  <p>G17: 1426666980<br/>8 out of 9 good<br/>Bayesian Score: 1.026</p> |  <p>G18: -648390934<br/>10 out of 12 good<br/>Bayesian Score: 1.020</p> |  <p>G19: 1773007393<br/>12 out of 15 good<br/>Bayesian Score: 1.016</p> |  <p>G20: 900585349<br/>17 out of 23 good<br/>Bayesian Score: 0.990</p> |

Supplemental Figure 4. Combined dose response and cytotoxicity Bayesian model: bad features from FCFP\_6.

|                                                                                                                                                            |                                                                                                                                                            |                                                                                                                                                          |                                                                                                                                                            |                                                                                                                                                             |
|------------------------------------------------------------------------------------------------------------------------------------------------------------|------------------------------------------------------------------------------------------------------------------------------------------------------------|----------------------------------------------------------------------------------------------------------------------------------------------------------|------------------------------------------------------------------------------------------------------------------------------------------------------------|-------------------------------------------------------------------------------------------------------------------------------------------------------------|
| 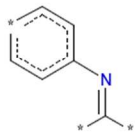 <p>B1: -1699460258<br/>0 out of 59 good<br/>Bayesian Score: -2.746</p>   |  <p>B2: 1087307120<br/>0 out of 43 good<br/>Bayesian Score: -2.454</p>    |  <p>B3: -437082084<br/>0 out of 37 good<br/>Bayesian Score: -2.317</p>  |  <p>B4: 1813774889<br/>0 out of 36 good<br/>Bayesian Score: -2.292</p>   |  <p>B5: -1528325941<br/>0 out of 36 good<br/>Bayesian Score: -2.292</p>  |
|  <p>B6: -2024954534<br/>0 out of 36 good<br/>Bayesian Score: -2.292</p>   |  <p>B7: -1236091207<br/>0 out of 36 good<br/>Bayesian Score: -2.292</p>   |  <p>B8: -438280287<br/>0 out of 36 good<br/>Bayesian Score: -2.292</p>  |  <p>B9: 267940428<br/>0 out of 36 good<br/>Bayesian Score: -2.292</p>    |  <p>B10: -1731186150<br/>0 out of 36 good<br/>Bayesian Score: -2.292</p> |
|  <p>B11: 2056975573<br/>0 out of 36 good<br/>Bayesian Score: -2.292</p>   |  <p>B12: -1227636663<br/>0 out of 36 good<br/>Bayesian Score: -2.292</p>  |  <p>B13: 2101570543<br/>0 out of 36 good<br/>Bayesian Score: -2.292</p> |  <p>B14: -1185638464<br/>0 out of 33 good<br/>Bayesian Score: -2.215</p> |  <p>B15: 100031611<br/>0 out of 30 good<br/>Bayesian Score: -2.130</p>   |
|  <p>B16: -1058561716<br/>0 out of 29 good<br/>Bayesian Score: -2.100</p> |  <p>B17: -1208154531<br/>0 out of 28 good<br/>Bayesian Score: -2.070</p> |  <p>B18: 747352596<br/>0 out of 26 good<br/>Bayesian Score: -2.005</p> |  <p>B19: 91575904<br/>0 out of 26 good<br/>Bayesian Score: -2.005</p>   |  <p>B20: 374776331<br/>0 out of 26 good<br/>Bayesian Score: -2.005</p>  |

Supplemental Figure 5. Examples of GSK compounds (see Molecule Name) clustering with TB Mobile compounds known to target specific *Mtb* targets (see Target Gene 1).

A

| Structure                                                                          | Molecule Name | Cluster(1) | TargetGene1    |
|------------------------------------------------------------------------------------|---------------|------------|----------------|
| 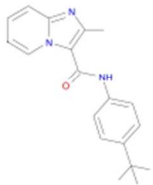  | GSK1829660A   | 21         |                |
|   | GSK762874A    | 21         | qcrB (Rv2196)  |
|  | SB-204804-A   | 23         | panC (Rv3602c) |

B

|                                                                                     |             |    |                |
|-------------------------------------------------------------------------------------|-------------|----|----------------|
| 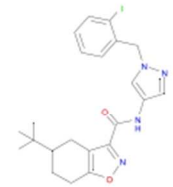 | GSK636544A  | 23 | panC (Rv3602c) |
|  | SB-204804-A | 23 |                |
|  | GSK636544A  | 23 |                |

C

|                                                                                   |            |    |               |
|-----------------------------------------------------------------------------------|------------|----|---------------|
| 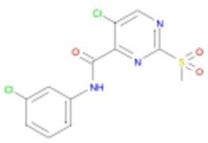 |            | 36 | alr (Rv3423c) |
|  | GSK991960A | 36 |               |
|  |            | 36 | ivG (Rv1820)  |

D

|                                                                                     |            |    |                 |
|-------------------------------------------------------------------------------------|------------|----|-----------------|
| 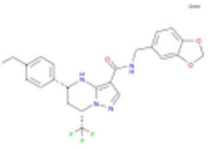 |            | 39 | mmpL3 (Rv0206c) |
|  | GSK937733A | 39 |                 |
|  | GSK798463A | 39 |                 |

E

|                                                                                   |             |    |               |
|-----------------------------------------------------------------------------------|-------------|----|---------------|
| 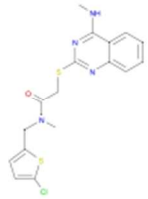 | GSK1925843A | 39 |               |
|  |             | 39 | alr (Rv3423c) |
|  | GSK1859936A | 39 |               |

F

|                                                                                     |             |    |               |
|-------------------------------------------------------------------------------------|-------------|----|---------------|
| 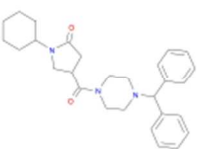 |             | 49 | inhA (Rv1484) |
|  | GSK1729177A | 49 |               |
|  |             | 49 | inhA (Rv1484) |
