# Supplementary material
Source: PubMed Central journal article supplement (PMC3910492)
Supplement: NIHMS534558-supplement-2_si_002.pdf [file NIHMS534558-supplement-2_si_002.pdf]

## Supplemental Tables

### Fusing Dual-Event Datasets for Mycobacterium Tuberculosis Machine Learning Models and their Evaluation

Sean Ekins<sup>†,‡\*</sup>, Joel S. Freundlich<sup>§,||</sup> and Robert C. Reynolds<sup>⊥</sup>

<sup>†</sup> Collaborative Drug Discovery, 1633 Bayshore Highway, Suite 342, Burlingame, CA 94010, USA.

<sup>‡</sup> Collaborations in Chemistry, 5616 Hilltop Needmore Road, Fuquay-Varina, NC 27526, USA.

<sup>§</sup> Department of Medicine, Center for Emerging and Reemerging Pathogens, Rutgers University – New Jersey Medical School, 185 South Orange Avenue, Newark, NJ 07103, USA.

<sup>||</sup> Department of Pharmacology & Physiology, Rutgers University – New Jersey Medical School, 185 South Orange Avenue, Newark, NJ 07103, USA.

<sup>⊥</sup> University of Alabama at Birmingham, College of Arts and Sciences, Department of Chemistry, 1530 3<sup>rd</sup> Avenue South, Birmingham, AL 35294-1240, USA.

\*To whom correspondence should be addressed. E-mail: [ekinssean@yahoo.com](mailto:ekinssean@yahoo.com)

Running title: Fusing datasets for *Mtb*

**Supplemental Table 1. Mean ( $\pm$  sd) leave-one-out and leave-out 50% x 100 cross-validation of Bayesian models**

**(ROC = receiver operator characteristic). Best Split for ARRA = -2.292, best split for combined = -0.712.**

| Dataset<br>(number of<br>molecules)               | Leave-one-<br>out ROC | Leave-out 50%<br>x 100 External<br>ROC Score | Leave-out<br>50% x 100<br>Internal ROC<br>Score | Leave-out 50%<br>x 100<br>Concordance | Leave-out<br>50% x 100<br>Specificity | Leave-out 50%<br>x 100 Sensitivity |
|---------------------------------------------------|-----------------------|----------------------------------------------|-------------------------------------------------|---------------------------------------|---------------------------------------|------------------------------------|
| ARRA dose<br>response &<br>cytotoxicity<br>(1924) | 0.87                  | 0.85 $\pm$ 0.02                              | 0.86 $\pm$ 0.02                                 | 80.13 $\pm$ 5.32                      | 80.31 $\pm$ 5.85                      | 75.85 $\pm$ 8.74                   |
| Combined<br>MLSMR,<br>TAACF-CB2                   | 0.71                  | 0.74 $\pm$ 0.01                              | 0.75 $\pm$ 0.01                                 | 69.39 $\pm$ 1.98                      | 70.79 $\pm$ 3.85                      | 65.34 $\pm$ 4.1                    |

|                                                                       |  |  |  |  |  |  |
|-----------------------------------------------------------------------|--|--|--|--|--|--|
| and TAACF<br>Kinase dose<br>response<br>and<br>cytotoxicity<br>(5304) |  |  |  |  |  |  |
|-----------------------------------------------------------------------|--|--|--|--|--|--|

**Supplemental Table 2. GSK *Mtb* hits scored – see excel file**

**Supplemental Table 3. Clustering GSK *Mtb* hits using MDL fingerprints to infer *Mtb* targets – see excel file.**
